# Supplementary material for: MRI Deep Learning-Based Solution for Alzheimer’s Disease Prediction
Source: MDPI journal article supplement (doi:10.3390/jpm11090902), 2021-09-09
Supplement: s1 [file s1]

**Table S1.** Summary of cases excluded from the OASIS-2 dataset.

| MRI ID        | MRI ID        | MRI ID        |
|---------------|---------------|---------------|
| OAS2_0013_MR1 | OAS2_0090_MR1 | OAS2_0137_MR2 |
| OAS2_0014_MR2 | OAS2_0091_MR1 | OAS2_0140_MR1 |
| OAS2_0023_MR2 | OAS2_0094_MR1 | OAS2_0140_MR2 |
| OAS2_0032_MR1 | OAS2_0096_MR1 | OAS2_0144_MR1 |
| OAS2_0032_MR2 | OAS2_0098_MR2 | OAS2_0145_MR1 |
| OAS2_0034_MR4 | OAS2_0101_MR1 | OAS2_0146_MR2 |
| OAS2_0044_MR1 | OAS2_0102_MR1 | OAS2_0149_MR1 |
| OAS2_0044_MR2 | OAS2_0102_MR2 | OAS2_0152_MR1 |
| OAS2_0044_MR3 | OAS2_0103_MR3 | OAS2_0156_MR1 |
| OAS2_0048_MR5 | OAS2_0104_MR1 | OAS2_0157_MR1 |
| OAS2_0051_MR1 | OAS2_0104_MR2 | OAS2_0158_MR1 |
| OAS2_0051_MR2 | OAS2_0114_MR1 | OAS2_0160_MR2 |
| OAS2_0051_MR3 | OAS2_0114_MR2 | OAS2_0162_MR1 |
| OAS2_0062_MR3 | OAS2_0117_MR2 | OAS2_0165_MR2 |
| OAS2_0068_MR1 | OAS2_0117_MR3 | OAS2_0175_MR1 |
| OAS2_0070_MR1 | OAS2_0117_MR4 | OAS2_0175_MR3 |
| OAS2_0077_MR1 | OAS2_0120_MR1 | OAS2_0179_MR1 |
| OAS2_0077_MR2 | OAS2_0126_MR1 | OAS2_0179_MR2 |
| OAS2_0080_MR1 | OAS2_0126_MR2 | OAS2_081_MR1  |
| OAS2_0081_MR1 | OAS2_0127_MR3 | OAS2_0182_MR2 |
| OAS2_0085_MR2 | OAS2_0127_MR4 | OAS2_0185_MR1 |
| OAS2_0087_MR1 | OAS2_0134_MR2 | OAS2_0185_MR3 |
| OAS2_0088_MR1 | OAS2_0135_MR1 |               |
